# Supplementary material
Source: HighWire-hosted journal article supplement (http://www.qdcxjkg.com/highwire/filestream/113560/field_highwire_adjunct_files/0/online_data_supplement.pdf)
Supplement: online_data_supplement.pdf [file online_data_supplement.pdf]

**Online data supplement:** Test performance with the probable TB group excluded from the analysis, differences in test performance data and detailed cost effectiveness and sensitivity analyses methodologies and data

**Do adjunct TB tests, when combined with Xpert MTB/RIF, improve accuracy and the cost of diagnosis in a resource-poor setting?**

Grant Theron<sup>1†</sup>, Anil Pooran<sup>1</sup>, Jonny Peter<sup>1</sup>, Richard van Zyl-Smit<sup>1</sup>, Hridayesh Kumar Mishra<sup>2</sup>, Richard Meldau<sup>1</sup>, Greg Calligaro<sup>1</sup>, Brian Allwood<sup>1</sup>, Surendra Kumar Sharma<sup>2</sup>, Rod Dawson<sup>1</sup>, Keertan Dheda<sup>1, 3, 4\*</sup>

<sup>1</sup>Lung Infection and Immunity Unit, Division of Pulmonology & UCT Lung Institute, Department of Medicine, University of Cape Town, Cape Town, South Africa.

<sup>2</sup>Department of Medicine, All India Institute of Medical Sciences, New Delhi, India.

<sup>3</sup>Institute of Infectious Diseases and Molecular Medicine, University of Cape Town, Cape Town, South Africa.

<sup>4</sup>Department of Infection, University College London Medical School, London, United Kingdom.

Requests for reprints should be addressed to Keertan Dheda, H47 Old Main Building, Groote Schuur Hospital, Observatory, 7925, South Africa or keertan.dheda@uct.ac.za

\*Corresponding author: keertan.dheda@uct.ac.za, +27214046509 (telephone), +27214047651 (fax)

## Diagnostic accuracy tables

**Table S1.** The performance of different diagnostic tests (smear microscopy, Xpert MTB/RIF, CXR, TSPOT-TB, and QFT-GIT), alone or in combination with one another, for the detection of TB stratified by HIV status [individuals with ‘probable TB’ (i.e. no microbiological evidence for TB but placed on anti-TB treatment by the attending clinician) are omitted from performance calculations].

|                                                                                                                                                      | Frontline performance in all TB suspects* |                     |                                      |                    |                                    |                    |
|------------------------------------------------------------------------------------------------------------------------------------------------------|-------------------------------------------|---------------------|--------------------------------------|--------------------|------------------------------------|--------------------|
|                                                                                                                                                      | All patients<br>n=480                     |                     | HIV-uninfected<br>n=286 <sup>†</sup> |                    | HIV-infected<br>n=130 <sup>‡</sup> |                    |
|                                                                                                                                                      | sens. <sup>†</sup>                        | spec. <sup>§</sup>  | sens. <sup>†</sup>                   | spec. <sup>§</sup> | sens. <sup>†</sup>                 | spec. <sup>§</sup> |
| Xpert MTB/RIF                                                                                                                                        | 77.2%<br>115/149                          | 95.5%<br>(22/9/241) | 81.0%<br>68/84                       | 95.2%<br>(140/147) | 70.0%<br>35/50                     | 95.0%<br>(51/55)   |
| Smear microscopy                                                                                                                                     | 68.5%<br>102/149                          | 99.6%<br>(240/241)  | 77.4%<br>65/84                       | 100.0%<br>(47/47)  | 52.0%<br>26/50                     | 98.2%<br>(54/55)   |
| Smear microscopy combined with Xpert MTB/RIF (performed if smear-negative)                                                                           | 81.9%<br>122/149                          | 94.6%<br>(228/241)  | 85.7%<br>72/84                       | 95.2%<br>(140/147) | 74.0%<br>37/50                     | 90.9%<br>(50/55)   |
| CXR for active TB                                                                                                                                    | 100.0%<br>106/106                         | 36.1%<br>(52/144)   | 100.0%<br>59/59                      | 40.5%<br>(34/84)   | 100.0%<br>37/37                    | 36.1%<br>(13/61)   |
| CXR followed by Xpert MTB/RIF if radiology is compatible with active TB                                                                              | 77.4%<br>82/106                           | 97.2%<br>140/144    | 83.1%<br>49/59                       | 96.4%<br>(81/84)   | 64.9%<br>24/37                     | 97.2%<br>35/36     |
| Smear microscopy followed by CXR (performed if smear-negative), followed by Xpert MTB/RIF (performed if the radiograph is compatible with active TB) | 83.0%<br>88/106                           | 96.5%<br>138/143    | 89.8%<br>53/59                       | 96.4%<br>80/83     | 67.6%<br>25/37                     | 94.4%<br>34/36     |
| TSPOT.TB                                                                                                                                             | 85.0%<br>91/107                           | 44.7%<br>(68/152)   | 85.9%<br>55/64                       | 36.2%<br>(34/94)   | 82.4%<br>28/34                     | 65.7%<br>(23/35)   |
| QFT-GIT                                                                                                                                              | 84.9%<br>90/106                           | 40.7%<br>(70/172)   | 87.7%<br>57/65                       | 36.6%<br>(41/112)  | 80.6%<br>25/31                     | 48.5%<br>(16/33)   |
|                                                                                                                                                      | <b>PPV</b>                                | <b>NPV</b>          | <b>PPV</b>                           | <b>NPV</b>         | <b>PPV</b>                         | <b>NPV</b>         |
| Xpert MTB/RIF                                                                                                                                        | 90.6%<br>115/127                          | 89.4%<br>(228/225)  | 90.7%<br>68/75                       | 92.3%<br>(140/156) | 89.7%<br>35/39                     | 83.5%<br>(51/66)   |
| Smear microscopy                                                                                                                                     | 99.0%<br>102/103                          | 83.6%<br>240/287    | 100.0%<br>65/65                      | 88.6%<br>147/166   | 96.3%<br>26/27                     | 69.2%<br>(54/78)   |
| Smear microscopy combined with Xpert MTB/RIF (performed if smear-negative)                                                                           | 90.4%<br>122/135                          | 66.9%<br>(228/341)  | 91.1%<br>72/79                       | 92.1%<br>140/152   | 88.1%<br>37/42                     | 79.4%<br>(50/63)   |
| CXR for active TB                                                                                                                                    | 53.5%<br>106/198                          | 100.0%<br>52/52     | 54.1%<br>59/109                      | 100.0%<br>34/34    | 61.7%<br>37/60                     | 100.0%<br>13/13    |
| CXR followed by Xpert MTB/RIF if radiology is compatible with active TB                                                                              | 95.3%<br>82/86                            | 85.4%<br>140/164    | 94.2%<br>49/52                       | 89.0%<br>81/91     | 96.0%<br>24/25                     | 72.9%<br>35/48     |
| Smear microscopy followed by CXR (performed if smear-negative), followed by Xpert MTB/RIF (performed if the radiograph is compatible with active TB) | 94.6%<br>88/93                            | 88.5%<br>138/156    | 94.6%<br>53/56                       | 93.0%<br>80/86     | 92.6%<br>25/27                     | 73.9%<br>34/46     |
| TSPOT.TB                                                                                                                                             | 52.0%<br>91/175                           | 81.0%<br>68/84      | 47.8%<br>55/155                      | 79.1%<br>34/43     | 70.0%<br>28/40                     | 79.3%<br>23/29     |
| QFT-GIT                                                                                                                                              | 46.9%<br>90/192                           | 81.4%<br>70/86      | 44.5%<br>57/128                      | 83.7%<br>41/49     | 59.5%<br>25/42                     | 72.7%<br>16/22     |

\*Liquid culture positivity for *Mycobacterium tuberculosis* served as a reference standard

†54 Xpert MTB/RIF-negative individuals were of unknown HIV status (test refused or data missing)

‡ Test sensitivity was calculated by dividing the number of individuals positive for the adjunct test(s) by the number of culture-positive individuals who had received the same adjunct test(s) (i.e. only the non-TB group). Not all individuals received the same combination of tests.

§Test specificity was calculated by dividing the number of culture-negative individuals negative for the adjunct test(s) by the number of culture-negative individuals who had received the same adjunct test(s) but did not have treatment initiated based on clinical suspicion (i.e. only the non-TB group). Not all individuals received the same combination of tests.

**Table S2.** Performance of different diagnostic tests stratified by HIV status for the detection of TB in individuals negative for a single Xpert MTB/RIF test [individuals with ‘probable TB’ (i.e. no microbiological evidence for TB but placed on anti-TB treatment by the attending clinician) are omitted from performance calculations].

|                                                                         | Performance in Xpert MTB/RIF-negative individuals* |                    |                                      |                    |                                   |                    |
|-------------------------------------------------------------------------|----------------------------------------------------|--------------------|--------------------------------------|--------------------|-----------------------------------|--------------------|
|                                                                         | All patients<br>n=350                              |                    | HIV-uninfected<br>n=209 <sup>†</sup> |                    | HIV-infected<br>n=91 <sup>†</sup> |                    |
|                                                                         | sens. <sup>‡</sup>                                 | spec. <sup>§</sup> | sens. <sup>‡</sup>                   | spec. <sup>§</sup> | sens. <sup>‡</sup>                | spec. <sup>§</sup> |
| <b>Smear microscopy</b>                                                 | 20.6%<br>7/34                                      | 99.6%<br>228/229   | 25.0%<br>4/16                        | 100.0%<br>140/140  | 13.3%<br>2/15                     | 98.0%<br>50/51     |
| <b>CXR for active TB</b>                                                | 100.0%<br>24/24                                    | 36.7%<br>51/139    | 100.0%<br>10/10                      | 41.3%<br>33/80     | 100.0%<br>13/13                   | 37.1%<br>13/25     |
| <b>Smear microscopy combined with CXR (performed if smear-negative)</b> | 100.0%<br>24/24                                    | 36.7%<br>51/139    | 100.0%<br>10/10                      | 41.3%<br>33/80     | 100.0%<br>13/13                   | 37.1%<br>13/35     |
| <b>TSPOT.TB</b>                                                         | 74.1%<br>20/27                                     | 44.2%<br>65/147    | 73.3%<br>11/15                       | 36.3%<br>33/91     | 77.8%<br>7/9                      | 63.6%<br>21/33     |
| <b>QFT-GIT</b>                                                          | 80.0%<br>20/25                                     | 41.5%<br>68/164    | 84.6%<br>11/13                       | 36.8%<br>39/106    | 77.8%<br>7/9                      | 51.6%<br>16/31     |
|                                                                         | <b>PPV</b>                                         | <b>NPV</b>         | <b>PPV</b>                           | <b>NPV</b>         | <b>PPV</b>                        | <b>NPV</b>         |
| <b>Smear microscopy</b>                                                 | 77.8%<br>7/9                                       | 66.9%<br>228/341   | 80.0%<br>4/5                         | 68.6%<br>140/204   | 66.7%<br>2/3                      | 56.8%<br>50/88     |
| <b>CXR for active TB</b>                                                | 21.4%<br>24/112                                    | 100.0%<br>56/56    | 17.5%<br>10/57                       | 100.0%<br>26/26    | 37.1%<br>13/35                    | 100.0%<br>15/15    |
| <b>Smear microscopy combined with CXR (performed if smear-negative)</b> | 21.4%<br>24/112                                    | 100.0%<br>51/51    | 17.5%<br>10/57                       | 100.0%<br>33/33    | 37.1%<br>13/35                    | 100.0%<br>13/13    |
| <b>TSPOT.TB</b>                                                         | 19.6%<br>20/102                                    | 90.3%<br>65/72     | 15.9%<br>11/69                       | 89.2%<br>33/37     | 36.8%<br>7/19                     | 91.3%<br>21/23     |
| <b>QFT-GIT</b>                                                          | 17.2%<br>20/116                                    | 93.2%<br>68/73     | 14.1%<br>11/78                       | 95.1%<br>39/41     | 31.8%<br>7/22                     | 88.9%<br>16/18     |

\*Liquid culture positivity for *Mycobacterium tuberculosis* served as a reference standard

<sup>†</sup>41 Xpert MTB/RIF-negative individuals were of unknown HIV status (test refused or data missing)

<sup>‡</sup> Test sensitivity was calculated by dividing the number of Xpert MTB/RIF-negative individuals positive for the adjunct test(s) by the number of Xpert MTB/RIF-negative, culture-positive individuals who had received the same adjunct test(s) (i.e. only the non-TB group). Not all individuals received the same combination of tests.

<sup>§</sup>Test specificity was calculated by dividing the number of Xpert MTB/RIF-negative, culture-negative individuals negative for the adjunct test(s) by the number of Xpert MTB/RIF-negative, culture-negative individuals who had received the same adjunct test(s) but did not have treatment initiated based on clinical suspicion (i.e. only the non-TB group). Not all individuals received the same combination of tests.

**Table S3.** Differences in overall performance between different diagnostic strategies

|                                                                                                                              | Percentage change in performance between different diagnostic strategies* |                             |                        |                        |                               |                        |
|------------------------------------------------------------------------------------------------------------------------------|---------------------------------------------------------------------------|-----------------------------|------------------------|------------------------|-------------------------------|------------------------|
|                                                                                                                              | All patients                                                              |                             | HIV-uninfected         |                        | HIV-infected                  |                        |
|                                                                                                                              | sens.<br>(95% CI)                                                         | spec.<br>(95% CI)           | sens.<br>(95% CI)      | spec.<br>(95% CI)      | sens.<br>(95% CI)             | spec.<br>(95% CI)      |
| <b>Smear microscopy followed by Xpert MTB/RIF vs. smear microscopy alone</b>                                                 | 13.4<br>(3.7, 23.1)<br>p<0.01                                             | -4.2<br>(-6.8, -1.6)        | 8.3<br>(-3.3, 20.0)    | -4.0<br>(-7.2, -0.7)   | 22.0<br>(3.6, 40.4)<br>p<0.05 | -5.0<br>(-10.8, 0.8)   |
| <b>Smear microscopy followed by Xpert MTB/RIF vs. Xpert MTB/RIF alone</b>                                                    | 4.7<br>(-4.4, 13.8)                                                       | -0.6<br>(-3.8, 2.7)         | 4.8<br>(-6.5, 16.0)    | 0.1<br>(-4.2, 4.2)     | 4.0<br>(-13.6, 21.6)          | -1.3<br>(-8.4, 5.9)    |
| <b>CXR followed by Xpert MTB/RIF vs. Xpert MTB/RIF alone</b>                                                                 | 0.2<br>(-10.2, 10.6)                                                      | 1.3<br>(-1.9, 4.6)          | 2.1<br>(-10.6, 14.8)   | 1.1<br>(-3.4, 5.5)     | -5.1<br>(-25.1, 14.8)         | 3.1<br>(-2.8, 9.1)     |
| <b>Smear microscopy followed by CXR followed by Xpert MTB/RIF vs. smear microscopy followed by Xpert MTB/RIF<sup>†</sup></b> | 1.1<br>(-8.3, 10.1)                                                       | 1.5<br>(-2.0, 4.5)          | 4.1<br>(-6.6, 14.9)    | 1.1<br>(-3.4, 5.6)     | -6.4<br>(-25.8, 12.9)         | 2.6<br>(-4.6, 9.9)     |
| <b>Smear microscopy followed by CXR followed by Xpert MTB/RIF vs. CXR followed by Xpert MTB/RIF<sup>†</sup></b>              | 5.7<br>(-5.0, 16.4)                                                       | -0.4<br>(-3.9, 3.0)         | 6.8<br>(-5.5, 19.1)    | 0.0<br>(-4.7, 4.7)     | 2.7<br>(-18.8, 24.2)          | -1.8<br>(-7.9, 4.3)    |
|                                                                                                                              | <b>PPV</b><br>(95% CI)                                                    | <b>NPV</b><br>(95% CI)      | <b>PPV</b><br>(95% CI) | <b>NPV</b><br>(95% CI) | <b>PPV</b><br>(95% CI)        | <b>NPV</b><br>(95% CI) |
| <b>Smear microscopy followed by Xpert MTB/RIF vs. smear microscopy alone</b>                                                 | -9.4<br>(-15.7, -3.6)                                                     | 4.6<br>(0.2, 9.0)<br>p<0.05 | -9.2<br>(-17.4, -10.4) | 6.0<br>(-4.3, 16.3)    | -8.2<br>(-20.3, 3.9)          | 8.5<br>(-2.5, 19.6)    |
| <b>Smear microscopy followed by Xpert MTB/RIF vs. Xpert MTB/RIF alone</b>                                                    | -0.7<br>(-8.4, 7.0)                                                       | 1.8<br>(-2.4, 6.0)          | 1.7<br>(-8.7, 12.1)    | 1.8<br>(-3.1, 6.6)     | -1.6<br>(-15.3, 12.0)         | 1.7<br>(-8.9, 12.3)    |
| <b>CXR followed by Xpert MTB/RIF vs. Xpert MTB/RIF alone</b>                                                                 | 3.7<br>(-4.1, 11.5)                                                       | -0.5<br>(-5.5, 4.4)         | 4.6<br>(-6.2, 15.5)    | 3.0<br>(-2.1, 8.1)     | 6.2<br>(-6.0, 18.4)           | -2.9<br>(-15.1, 9.2)   |
| <b>Smear microscopy followed by CXR followed by Xpert MTB/RIF vs. smear microscopy followed by Xpert MTB/RIF<sup>†</sup></b> | 3.9<br>(-3.8, 11.7)                                                       | 0.0<br>(-4.5, 4.5)          | 3.6<br>(-6.5, 13.7)    | 1.3<br>(-3.6, 6.1)     | 4.5<br>(-9.4, 18.4)           | -3.7<br>(-15.7, 8.3)   |
| <b>Smear microscopy followed by CXR followed by Xpert MTB/RIF vs. CXR followed by Xpert MTB/RIF<sup>†</sup></b>              | -0.4<br>(-8.3, 7.4)                                                       | 2.3<br>(-2.9, 7.5)          | 0.6<br>(-9.9, 11.2)    | 2.8<br>(-2.9, 8.6)     | -3.4<br>(-15.9, 9.1)          | 0.9<br>(-12.4, 14.3)   |

\*Performance data from Table 1 is used to calculate the percentage change in performance.

†The smear microscopy followed by CXR followed by Xpert MTB/RIF strategy and had the same diagnostic accuracy as the CXR followed by smear microscopy followed by Xpert MTB/RIF strategy.

## **Cost analysis methodology, figures and tables**

The cost analysis was performed from a healthcare provider perspective to the diagnostic test costs and outcomes of Xpert MTB/RIF testing on its own or in combination with various pre-screening tests.

### **Model**

A decision tree model was constructed to investigate six different diagnostic screening scenarios: (i) smear microscopy only; (ii) Xpert MTB/RIF only; (iii) smear microscopy followed by Xpert MTB/RIF (performed if smear-negative); (iv) CXR followed by Xpert MTB/RIF (performed if the chest radiograph was suggestive of TB); (v) a combination of smear microscopy, followed by CXR (performed if smear-negative) and Xpert MTB/RIF (performed if the chest radiograph was suggestive of TB); (vi) a combination of CXR, followed by smear microscopy (performed if CXR is suggestive of active TB) and Xpert MTB/RIF testing (performed if smear-negative) (Figure 1). The decision tree was constructed using TreeAge Pro 2011 (TreeAge Software Inc., Williamston, USA) and calculations were performed using Excel 2007 (Microsoft, USA). Tests results inputted into the model were normalised from our diagnostic accuracy data shown in Table 1.

### **Test Costs**

Smear microscopy costs were obtained from the National Health Laboratory Service in South Africa and represent the actual costs incurred by the South African government. CXR costs specific for South Africa were taken from the literature (Vassal and Cobelens, StopTB presentation 2011, <http://www.stoptb.org/wg/gli/assets/documents/Mtg3pres/Day%201/session%203/Xpert%20MTB%20RIF%20%20scenarios%20for%20cost%20effectiveness%200A%20Vassall.pdf>). The cost of a single Xpert MTB/RIF test was calculated using WHO estimates (1) for equipment and consumables. These costs represent the compassionate pricing offered by Cepheid to low income countries. Other cost components such as

technician salary and other capital expenses were calculated using South Africa specific cost data. Capital costs were annualised at a discount rate of 3% and an assumed useful lifetime of 8 years for a Gene Xpert MTB/RIF IV machine. The cost per Xpert MTB/RIF test was calculated as the total annual cost of the machine plus the total cost of tests done in a year divided by the total number of valid tests run in a year. All prices are quoted in 2011 \$US dollars at an exchange rate of \$US 1 = ZAR 7.05. Test costs are shown in Table S1 and cost components of an Xpert MTB/RIF test are shown in Table S2.

#### Cost of diagnosis

In addition to the test costs, the number of TB cases detected by each strategy was also reported. The cost per TB case detected was calculated using the incremental cost of each strategy (compared to smear microscopy) divided by the number of TB cases correctly diagnosed by that strategy compared to smear microscopy.

#### Univariate and multivariate sensitivity analyses

A univariate sensitivity analysis was performed by varying test sensitivities and specificities by ~15-20%. Xpert MTB/RIF test costs were varied using private costs as the high estimate and 50% of the compassionate base case cost as the lower estimate. CXR costs were doubled for the high estimate and halved for the low estimate. Additionally, the cost of performing sequential smears was investigated. The incremental increase or decrease in sensitivity of serial smear examinations has been reported in another South African study (2). This data was used to calculate the sensitivity of either performing one smear (low estimate) or three smears (high estimate) in our cohort. We also incorporated the cost of the additional smear exams in our sensitivity analysis. A multivariate analysis was also performed using effectiveness inputs from a large multicentre study to determine the cost effectiveness of these strategies in a different setting (i.e. Xpert MTB/RIF sensitivity and specificity in smear-positive individuals of 92% and 99%, respectively and 77% and 99%, respectively in smear-



negative individuals). Overall costs, the number of TB cases detected and the cost per TB case detected by each strategy were assessed in the multivariate analysis.

**Table S4.** Costs and the relevant source(s) used for the cost analysis (US\$1=ZAR7.05)

| <b>Item</b>                           | <b>Cost (US\$)</b> | <b>Source</b>                                    |
|---------------------------------------|--------------------|--------------------------------------------------|
| Smear microscopy                      | \$3.81             | South African National Health Laboratory Service |
| Chest X-ray                           | \$18.12            | StopTB, City of Cape Town                        |
| Xpert MTB/RIF (cost of a single test) | \$21.39            | Calculated from WHO (1)                          |

**Table S5.** Unit costs and relevant data for calculation of the per test price of a single Xpert MTB/RIF assay.

| <b>Item</b>                                                                                            | <b>Cost (US\$)</b> | <b>Source</b>                                                           |
|--------------------------------------------------------------------------------------------------------|--------------------|-------------------------------------------------------------------------|
| GeneXpert IV machine and workstation                                                                   | \$19,100           | WHO (2)                                                                 |
| Other capital and administrative costs                                                                 | \$7,314.35         | University of Cape Town (10% of total annual cost)                      |
| Maintenance (per year)                                                                                 | \$1800             | WHO (2)                                                                 |
| Cartridge and consumables                                                                              | \$16.86            | WHO (2)                                                                 |
| Technician salary<br>[based on hands-on time required to perform the assay (estimated at 2 hours/day)] | \$5,236.50         | WHO (2), Provincial Government of Western Cape 2010 -2011 salary scales |
| Training                                                                                               | \$161.10           | WHO (2), Cepheid                                                        |
| <b>Input</b>                                                                                           | <b>Value</b>       | <b>Source</b>                                                           |
| Discount rate                                                                                          | 3% per annum       | Assumed                                                                 |
| Life years of machine                                                                                  | 8 years            | Assumed                                                                 |
| Number of tests per year (15 tests/day and 250 days per year)                                          | 3750               | WHO (2)                                                                 |
| Number of evaluable tests/year (assuming 5% of tests are lost due to damaged or incorrect usage)       | 3562               | WHO (2)                                                                 |

**Table S6.** Costs and outcomes of different Xpert MTB/RIF strategies in HIV-uninfected patients

|                                                                   | <b>Smear microscopy alone</b> | <b>Xpert MTB/RIF alone</b> | <b>Smear microscopy followed by Xpert MTB/RIF (performed if smear-negative)</b> | <b>Chest X-ray followed by Xpert MTB/RIF (performed if CXR suggestive of active TB)</b> | <b>Smear microscopy, followed by chest X-ray (performed if smear-negative), followed by Xpert MTB/RIF (performed if CXR suggestive of active TB)</b> | <b>CXR, followed by smear microscopy (performed if CXR suggestive of active TB), followed by Xpert MTB/RIF (performed if smear-negative)</b> |
|-------------------------------------------------------------------|-------------------------------|----------------------------|---------------------------------------------------------------------------------|-----------------------------------------------------------------------------------------|------------------------------------------------------------------------------------------------------------------------------------------------------|----------------------------------------------------------------------------------------------------------------------------------------------|
| Total test cost                                                   | \$7,420.00                    | \$21,389.75                | \$23,798.87                                                                     | \$35,300.07                                                                             | \$30,751.83                                                                                                                                          | \$38,357.38                                                                                                                                  |
| Incremental cost vs. smear microscopy alone                       | -                             | \$13,969.75                | \$16,378.87                                                                     | \$27,880.07                                                                             | \$23,331.83                                                                                                                                          | \$30,937.38                                                                                                                                  |
| Number of TB cases detected by each strategy                      | 227.27                        | 236.93                     | 251.75                                                                          | 260.64                                                                                  | 281.91                                                                                                                                               | 281.91                                                                                                                                       |
| Additional number of TB cases detected vs. smear microscopy alone | -                             | 9.66                       | 24.48                                                                           | 33.37                                                                                   | 54.64                                                                                                                                                | 54.64                                                                                                                                        |
| Cost per TB case detected (compared to smear microscopy)          | -                             | \$1,445.98 <sup>#5</sup>   | \$669.19 <sup>#3</sup>                                                          | \$835.59 <sup>#4</sup>                                                                  | \$426.99 <sup>#1</sup>                                                                                                                               | \$566.18 <sup>#2</sup>                                                                                                                       |

<sup>#</sup>Superscripts <sup>1-5</sup> indicate the cost- ranking of each strategy; <sup>#1</sup> indicates the most costly strategy while <sup>#5</sup> indicates the least costly strategy.

**Table S7.** Costs and outcomes of different Xpert MTB/RIF strategies in HIV-infected patients

|                                                                   | <b>Smear microscopy alone</b> | <b>Xpert MTB/RIF alone</b> | <b>Smear microscopy followed by Xpert MTB/RIF (performed if smear-negative)</b> | <b>Chest X-ray followed by Xpert MTB/RIF (performed if CXR suggestive of active TB)</b> | <b>Smear microscopy, followed by chest X-ray (performed if smear-negative) , followed by Xpert MTB/RIF (performed if CXR suggestive of active TB)</b> | <b>CXR, followed by smear microscopy (performed if CXR suggestive of active TB), followed by Xpert MTB/RIF (performed if smear-negative)</b> |
|-------------------------------------------------------------------|-------------------------------|----------------------------|---------------------------------------------------------------------------------|-----------------------------------------------------------------------------------------|-------------------------------------------------------------------------------------------------------------------------------------------------------|----------------------------------------------------------------------------------------------------------------------------------------------|
| Total test cost                                                   | \$7,420.00                    | \$21,389.75                | \$24,367.26                                                                     | \$36,022.29                                                                             | \$34,072.89                                                                                                                                           | \$39,119.93                                                                                                                                  |
| Incremental cost vs. smear microscopy alone                       | -                             | \$13,969.75                | \$16,947.26                                                                     | \$28,602.29                                                                             | \$26,652.89                                                                                                                                           | \$31,699.93                                                                                                                                  |
| Number of TB cases detected by each strategy                      | 200.00                        | 269.23                     | 284.62                                                                          | 260.87                                                                                  | 271.74                                                                                                                                                | 271.74                                                                                                                                       |
| Additional number of TB cases detected vs. smear microscopy alone | -                             | 69.23                      | 84.62                                                                           | 60.87                                                                                   | 59.24                                                                                                                                                 | 59.24                                                                                                                                        |
| Cost per TB case detected (compared to smear microscopy)          | -                             | \$201.79 <sup>#2</sup>     | \$200.29 <sup>#1</sup>                                                          | \$469.89 <sup>#4</sup>                                                                  | \$449.92 <sup>#3</sup>                                                                                                                                | \$535.12 <sup>#5</sup>                                                                                                                       |

<sup>#</sup>Superscripts <sup>1-5</sup> indicate the cost- ranking of each strategy; <sup>#1</sup> indicates the most costly strategy while <sup>#5</sup> indicates the least costly strategy.

**Table S8.** Univariate sensitivity analysis. The cost per TB case detected compared to screening with smear microscopy alone was reported here.

| Diagnostic accuracy variables used                                      | Xpert MTB/RIF alone   | Smear microscopy followed by Xpert MTB/RIF (performed if smear-negative) | Chest X-ray followed by Xpert MTB/RIF (performed if radiograph compatible with TB) | Smear microscopy, followed by chest X-ray (performed if smear-negative) , followed by Xpert MTB/RIF (performed if chest radiograph compatible with TB) | Chest X-ray, followed by smear microscopy (performed if chest radiograph compatible with TB) followed by Xpert MTB/RIF (performed if smear-negative) |
|-------------------------------------------------------------------------|-----------------------|--------------------------------------------------------------------------|------------------------------------------------------------------------------------|--------------------------------------------------------------------------------------------------------------------------------------------------------|------------------------------------------------------------------------------------------------------------------------------------------------------|
| Base case analysis*                                                     | \$515.81 <sup>3</sup> | \$401.06 <sup>1</sup>                                                    | \$697.94 <sup>5</sup>                                                              | \$423.85 <sup>2</sup>                                                                                                                                  | \$ 531.40 <sup>4</sup>                                                                                                                               |
| Xpert MTB/RIF sensitivity                                               |                       |                                                                          |                                                                                    |                                                                                                                                                        |                                                                                                                                                      |
| 90%                                                                     | \$208.89 <sup>1</sup> | \$401.06 <sup>2</sup>                                                    | \$697.94 <sup>5</sup>                                                              | \$423.85 <sup>3</sup>                                                                                                                                  | \$ 531.40 <sup>4</sup>                                                                                                                               |
| 65%                                                                     | -                     | \$401.06 <sup>1</sup>                                                    | \$697.94 <sup>4</sup>                                                              | \$423.85 <sup>2</sup>                                                                                                                                  | \$ 531.40 <sup>3</sup>                                                                                                                               |
| Xpert MTB/RIF specificity                                               |                       |                                                                          |                                                                                    |                                                                                                                                                        |                                                                                                                                                      |
| 99%                                                                     | \$515.81 <sup>3</sup> | \$401.06 <sup>1</sup>                                                    | \$697.94 <sup>5</sup>                                                              | \$423.85 <sup>2</sup>                                                                                                                                  | \$ 531.40 <sup>4</sup>                                                                                                                               |
| 80%                                                                     | \$515.81 <sup>3</sup> | \$401.06 <sup>1</sup>                                                    | \$697.94 <sup>5</sup>                                                              | \$423.85 <sup>2</sup>                                                                                                                                  | \$ 531.40 <sup>4</sup>                                                                                                                               |
| Xpert MTB/RIF sensitivity in smear negatives                            |                       |                                                                          |                                                                                    |                                                                                                                                                        |                                                                                                                                                      |
| 70%                                                                     | \$515.81 <sup>3</sup> | \$243.80 <sup>1</sup>                                                    | \$697.94 <sup>5</sup>                                                              | \$423.85 <sup>2</sup>                                                                                                                                  | \$ 531.40 <sup>4</sup>                                                                                                                               |
| 30%                                                                     | \$515.81 <sup>2</sup> | \$568.88 <sup>4</sup>                                                    | \$697.94 <sup>5</sup>                                                              | \$423.85 <sup>1</sup>                                                                                                                                  | \$ 531.40 <sup>3</sup>                                                                                                                               |
| Xpert MTB/RIF specificity in smear negatives                            |                       |                                                                          |                                                                                    |                                                                                                                                                        |                                                                                                                                                      |
| 99%                                                                     | \$515.81 <sup>3</sup> | \$401.06 <sup>1</sup>                                                    | \$697.94 <sup>5</sup>                                                              | \$423.85 <sup>2</sup>                                                                                                                                  | \$ 531.40 <sup>4</sup>                                                                                                                               |
| 80%                                                                     | \$515.81 <sup>3</sup> | \$401.06 <sup>1</sup>                                                    | \$697.94 <sup>5</sup>                                                              | \$423.85 <sup>2</sup>                                                                                                                                  | \$ 531.40 <sup>4</sup>                                                                                                                               |
| Xpert MTB/RIF sensitivity in CXR suspected of TB                        |                       |                                                                          |                                                                                    |                                                                                                                                                        |                                                                                                                                                      |
| 90%                                                                     | \$515.81 <sup>4</sup> | \$401.06 <sup>2</sup>                                                    | \$345.68 <sup>1</sup>                                                              | \$423.85 <sup>3</sup>                                                                                                                                  | \$ 531.40 <sup>5</sup>                                                                                                                               |
| 65%                                                                     | \$515.81 <sup>3</sup> | \$401.06 <sup>1</sup>                                                    | \$183,557.27 <sup>5</sup>                                                          | \$423.85 <sup>2</sup>                                                                                                                                  | \$ 531.40 <sup>4</sup>                                                                                                                               |
| Xpert MTB/RIF specificity in CXR suspected of TB                        |                       |                                                                          |                                                                                    |                                                                                                                                                        |                                                                                                                                                      |
| 99%                                                                     | \$515.81 <sup>3</sup> | \$401.06 <sup>1</sup>                                                    | \$697.94 <sup>5</sup>                                                              | \$423.85 <sup>2</sup>                                                                                                                                  | \$ 531.40 <sup>4</sup>                                                                                                                               |
| 80%                                                                     | \$515.81 <sup>3</sup> | \$401.06 <sup>1</sup>                                                    | \$697.94 <sup>5</sup>                                                              | \$423.85 <sup>2</sup>                                                                                                                                  | \$ 531.40 <sup>4</sup>                                                                                                                               |
| Xpert MTB/RIF sensitivity in smear negatives with a CXR suspected of TB |                       |                                                                          |                                                                                    |                                                                                                                                                        |                                                                                                                                                      |
| 60%                                                                     | \$515.81 <sup>3</sup> | \$401.06 <sup>2</sup>                                                    | \$697.94 <sup>5</sup>                                                              | \$327.95 <sup>1</sup>                                                                                                                                  | \$ 531.40 <sup>4</sup>                                                                                                                               |
| 25%                                                                     | \$515.81 <sup>2</sup> | \$401.06 <sup>1</sup>                                                    | \$697.94 <sup>5</sup>                                                              | \$583.94 <sup>4</sup>                                                                                                                                  | \$ 531.40 <sup>3</sup>                                                                                                                               |
| Xpert MTB/RIF specificity in smear negatives with a CXR suspected of TB |                       |                                                                          |                                                                                    |                                                                                                                                                        |                                                                                                                                                      |
| 99%                                                                     | \$515.81 <sup>3</sup> | \$401.06 <sup>1</sup>                                                    | \$697.94 <sup>5</sup>                                                              | \$423.85 <sup>2</sup>                                                                                                                                  | \$ 531.40 <sup>4</sup>                                                                                                                               |
| 80%                                                                     | \$515.81 <sup>3</sup> | \$401.06 <sup>1</sup>                                                    | \$697.94 <sup>5</sup>                                                              | \$423.85 <sup>2</sup>                                                                                                                                  | \$ 531.40 <sup>4</sup>                                                                                                                               |

|                                                                         |                         |                         |                         |                         |                         |  |
|-------------------------------------------------------------------------|-------------------------|-------------------------|-------------------------|-------------------------|-------------------------|--|
| Xpert MTB/RIF sensitivity with a CXR suspected of TB in smear negatives |                         |                         |                         |                         |                         |  |
| 60%                                                                     | \$515.81 <sup>4</sup>   | \$401.06 <sup>1</sup>   | \$697.94 <sup>5</sup>   | \$423.85 <sup>3</sup>   | \$406.33 <sup>2</sup>   |  |
| 25%                                                                     | \$515.81 <sup>3</sup>   | \$401.06 <sup>1</sup>   | \$697.94 <sup>4</sup>   | \$423.85 <sup>2</sup>   | \$740.19 <sup>5</sup>   |  |
| Xpert MTB/RIF specificity with a CXR suspected of TB in smear negatives |                         |                         |                         |                         |                         |  |
| 99%                                                                     | \$515.81 <sup>3</sup>   | \$401.06 <sup>1</sup>   | \$697.94 <sup>5</sup>   | \$423.85 <sup>2</sup>   | \$ 531.40 <sup>4</sup>  |  |
| 80%                                                                     | \$515.81 <sup>3</sup>   | \$401.06 <sup>1</sup>   | \$697.94 <sup>5</sup>   | \$423.85 <sup>2</sup>   | \$ 531.40 <sup>4</sup>  |  |
| CXR sensitivity                                                         |                         |                         |                         |                         |                         |  |
| 90%                                                                     | \$515.81 <sup>3</sup>   | \$401.06 <sup>1</sup>   | \$904.65 <sup>5</sup>   | \$423.88 <sup>2</sup>   | \$656.64 <sup>4</sup>   |  |
| CXR specificity                                                         |                         |                         |                         |                         |                         |  |
| 40%                                                                     | \$515.81 <sup>3</sup>   | \$401.06 <sup>1</sup>   | \$2,201.73 <sup>5</sup> | \$424.18 <sup>2</sup>   | \$1,138.84 <sup>4</sup> |  |
| 10%                                                                     | \$515.81 <sup>5</sup>   | \$401.06 <sup>2</sup>   | \$414.46 <sup>3</sup>   | \$423.54 <sup>4</sup>   | \$319.67 <sup>1</sup>   |  |
| Smear specificity                                                       |                         |                         |                         |                         |                         |  |
| 80%                                                                     | \$515.81 <sup>3</sup>   | \$401.06 <sup>2</sup>   | \$697.94 <sup>5</sup>   | \$397.97 <sup>1</sup>   | \$548.53 <sup>4</sup>   |  |
| # of smears                                                             |                         |                         |                         |                         |                         |  |
| 1 smear                                                                 | \$256.77 <sup>1</sup>   | \$401.06 <sup>3</sup>   | \$389.00 <sup>2</sup>   | \$527.28 <sup>4</sup>   | \$633.27 <sup>5</sup>   |  |
| 3 smears                                                                | \$2,798.11 <sup>5</sup> | \$401.06 <sup>1</sup>   | \$1,433.73 <sup>4</sup> | \$459.13 <sup>2</sup>   | \$580.67 <sup>3</sup>   |  |
| Xpert MTB/RIF cost                                                      |                         |                         |                         |                         |                         |  |
| \$142.52                                                                | \$4,988.31 <sup>5</sup> | \$2,672.25 <sup>3</sup> | \$3,157.39 <sup>4</sup> | \$1,641.78 <sup>1</sup> | \$1,973.58 <sup>2</sup> |  |
| \$10.70                                                                 | \$121.11 <sup>1</sup>   | \$200.63 <sup>2</sup>   | \$480.89 <sup>5</sup>   | \$317.79 <sup>3</sup>   | \$404.13 <sup>4</sup>   |  |
|                                                                         |                         |                         |                         |                         |                         |  |
| CXR costs                                                               |                         |                         |                         |                         |                         |  |
| \$36.24                                                                 | \$515.81 <sup>2</sup>   | \$401.06 <sup>1</sup>   | \$1,144.39 <sup>5</sup> | \$657.57 <sup>3</sup>   | \$837.98 <sup>4</sup>   |  |
| \$9.06                                                                  | \$515.81 <sup>5</sup>   | \$401.06 <sup>3</sup>   | \$474.71 <sup>4</sup>   | \$307.00 <sup>1</sup>   | \$378.12 <sup>2</sup>   |  |
| TB prevalence                                                           |                         |                         |                         |                         |                         |  |
| 10%                                                                     | \$1,601.15 <sup>2</sup> | \$1,471.45 <sup>1</sup> | \$3,039.31 <sup>5</sup> | \$2,153.10 <sup>4</sup> | \$2,131.51 <sup>3</sup> |  |
| 50%                                                                     | \$320.23 <sup>3</sup>   | \$208.18 <sup>1</sup>   | \$658.12 <sup>5</sup>   | \$309.76 <sup>2</sup>   | \$385.62 <sup>4</sup>   |  |

\*See Table 1 for the performance data used in the base-case  
Superscripts <sup>1-5</sup> indicate the cost ranking of each strategy; <sup>1</sup> indicates the strategy with the lowest cost per TB case detected while <sup>5</sup> indicates the strategy with the highest cost per TB case detected

**Table S9.** Multivariate sensitivity analysis. Using Xpert MTB/RIF performance data from Boehme *et al.* (2011) (sensitivity in smear-positive and smear-negatives of 90% and 77% respectively)

|                                                                              | Smear microscopy alone | Xpert MTB/RIF alone    | Smear microscopy followed by Xpert MTB/RIF (performed if smear-negative) | Chest X-ray followed by Xpert MTB/RIF (performed if radiograph compatible with TB) | Smear microscopy, followed by chest X-ray (performed if smear-negative), followed by Xpert MTB/RIF (if radiograph compatible with TB) | Chest X-ray followed by Smear microscopy (if radiograph compatible with TB), followed by Xpert MTB/RIF (performed if smear-negative) |
|------------------------------------------------------------------------------|------------------------|------------------------|--------------------------------------------------------------------------|------------------------------------------------------------------------------------|---------------------------------------------------------------------------------------------------------------------------------------|--------------------------------------------------------------------------------------------------------------------------------------|
| Total test cost                                                              | \$7,420.00             | \$21,390.00            | \$24,130.94                                                              | \$35,746.94                                                                        | \$32,471.85                                                                                                                           | \$38,402.35                                                                                                                          |
| Incremental cost vs. smear microscopy alone                                  | -                      | \$13,970.00            | \$16,710.94                                                              | \$28,326.94                                                                        | \$25,051.85                                                                                                                           | \$30,982.35                                                                                                                          |
| Number of correctly diagnosed non-TB cases                                   | 683.33                 | 682.69                 | 676.50                                                                   | 651.23                                                                             | 661.76                                                                                                                                | 661.76                                                                                                                               |
| Number of correctly diagnosed TB cases                                       | 212.50                 | 285.58                 | 287.90                                                                   | 253.09                                                                             | 305.15                                                                                                                                | 305.15                                                                                                                               |
| Additional number of TB cases correctly diagnosed vs. smear microscopy alone | -                      | 73.08                  | 75.40                                                                    | 40.59                                                                              | 92.65                                                                                                                                 | 92.65                                                                                                                                |
| Cost per TB case detected (compared to smear microscopy)                     | -                      | \$191.15 <sup>#1</sup> | \$221.64 <sup>#2</sup>                                                   | \$697.94 <sup>#5</sup>                                                             | \$270.38 <sup>#3</sup>                                                                                                                | \$334.39 <sup>#4</sup>                                                                                                               |

<sup>#</sup>Superscripts <sup>1-5</sup> indicate the cost- ranking of each strategy; <sup>#1</sup> indicates the most costly strategy while <sup>#5</sup> indicates the least costly strategy.



**Bibliography**

1. WHO. Roadmap for Rolling Out Xpert MTB/RIF for Rapid Diagnosis of TB and MDR-TB World Health Organization, Geneva, Switzerland 2010.
2. Walker D, McNerney R, Mwembo MK, Foster S, Tihon V, Godfrey-Faussett P. An incremental cost-effectiveness analysis of the first, second and third sputum examination in the diagnosis of pulmonary tuberculosis. *The International Journal of Tuberculosis and Lung Disease*. 2000;4(3):246-51.
